# Supplementary material for: Diagnostic and Prognostic Risk Assessment of Heat Shock Protein HSPA1B rs2763979 Gene Variant in Asthma
Source: MDPI journal article supplement (doi:10.3390/genes13122391), 2022-12-16
Supplement: s1 [file s1]

**Table S1.** Characteristics of the included studies in the meta-analysis

| First author [Ref.]       | Year | Country     | Ethnicity | Disorder                         | Genotyping Method                | Patients |     |     |     | Controls* |     |     |     |
|---------------------------|------|-------------|-----------|----------------------------------|----------------------------------|----------|-----|-----|-----|-----------|-----|-----|-----|
|                           |      |             |           |                                  |                                  | N        | T/T | T/C | C/C | N         | T/T | T/C | C/C |
| Change et al. [44]        | 2021 | Taiwan      | Asian     | Age related hearing impairment   | TaqMan genotyping assay          | 146      | 11  | 50  | 82  | 146       | 20  | 72  | 50  |
| Wang et al. [14]          | 2021 | Chinese     | Asian     | Coronary artery disease          | PCR-ligase detection reaction    | 271      | 45  | 122 | 104 | 113       | 16  | 60  | 37  |
| Kowalczyk et al. [45]     | 2020 | Poland      | Caucasian | Paranoid schizophrenia           | PCR-RFLP                         | 377      | 44  | 162 | 171 | 524       | 63  | 224 | 237 |
| Ambrocio-Ortiz et al [16] | 2020 | Mexico      | Caucasian | Chronic obstructive lung disease | TaqMan genotyping assay          | 1103     | 321 | 624 | 158 | 424       | 89  | 244 | 91  |
| Dhamodharan [17]          | 2017 | South India | Asian     | Diabetic nephropathy             | PCR-RFLP                         | 460      | 186 | 397 | 107 | 256       | 37  | 107 | 49  |
| Li et al. [41]            | 2017 | China       | Asian     | Noise induced hearing loss       | SNPscan multiplex SNP genotyping | 286      | 49  | 133 | 104 | 286       | 31  | 139 | 116 |
| Chang et al. [46]         | 2011 | Taiwan      | Asian     | Noise induced hearing loss       | TaqMan genotyping assay          | 27       | 0   | 9   | 18  | 322       | 19  | 124 | 179 |
| Guo et al. [43]           | 2011 | China       | Asian     | Lung cancer                      | TaqMan genotyping assay          | 1152     | 94  | 457 | 601 | 1152      | 84  | 457 | 611 |

N: Number, PCR-RFLP: polymerase chain reaction- Restriction fragment length polymorphism. \*All enrolled controls in the included studies were population-based controls.
